Short title: High-throughput detection of STH infection

25 <sup>12</sup> Departments of Global Health, Medicine (Infectious Disease), Pediatrics and Epidemiology, University  
26 of Washington, Seattle, USA

27 <sup>13</sup> Department of International Health, Bloomberg School of Public Health, Johns Hopkins University,  
28 Baltimore, USA

29 ^ These authors contributed equally. Author Pilotte was placed first as he was primarily responsible for  
30 drafting manuscript text.

31 \* Corresponding author

32 Email: jwalson1@jh.edu

33

## 34 **Abstract:**

### 35 **Background**

36 Historically, soil-transmitted helminth (STH) control and prevention strategies have relied on mass  
37 drug administration efforts targeting preschool and school-aged children. While these efforts have  
38 succeeded in reducing morbidity associated with STH infection, recent modeling efforts have suggested  
39 that expanding intervention to treatment of the entire community could achieve transmission  
40 interruption in some settings. Testing the feasibility of such an approach requires large-scale clinical trials,  
41 such as the DeWorm3 cluster randomized trial. In addition, accurate interpretation of trial outcomes will  
42 require diagnostic platforms capable of accurately determining infection prevalence, particularly as  
43 infection intensity is reduced, at large population scale and with significant throughput. Here, we describe  
44 the development and validation of a multi-site, high-throughput molecular testing platform.

### 45 **Methodology/Principal Findings**

46 Through the development, selection, and validation of appropriate controls, we have successfully  
47 created and evaluated the performance of a testing platform capable of the semi-automated, high-  
48 throughput detection of four species of STH in human stool samples. Comparison of this platform with

Short title: High-throughput detection of STH infection

49 singleplex reference assays for the detection of these same pathogens has demonstrated comparable  
50 performance metrics across multiple testing locations, with index assay accuracy measuring at or above  
51 99.5% and 98.1% for each target species at the level of the technical replicate and individual extraction  
52 respectively. Through the implementation of a rigorous validation program, we have developed a  
53 diagnostic platform capable of providing the necessary throughput and performance needed to meet the  
54 needs of the DeWorm3 cluster randomized trial and other large-scale operational research efforts for STH.

55

### 56 **Importance:**

57 Current models predict that an expansion of intervention efforts to include community-wide  
58 treatment strategies could, in certain geographies, result in the elimination of soil-transmitted helminths  
59 as a public health problem. Large-scale operational research efforts to reduce the burden of STH such as  
60 the DeWorm3 cluster randomized trial have been organized to evaluate these predictions, but such  
61 evaluations require a high throughput testing strategy capable of providing sensitive, specific, and  
62 accurate results. To meet this need, we have developed a multiplexed diagnostic platform that was  
63 rigorously evaluated across multiple testing locations using a novel validation plan with pre-defined  
64 performance characteristics. Our successful validation of this platform has provided the community with  
65 a tool capable of meeting the diagnostic requirements of large-scale operational research efforts.  
66 Furthermore, this strategy provides a blueprint for the development of similar platforms adaptable for  
67 use with other neglected tropical disease programs evaluating other intervention strategies.

68

### 69 **Introduction:**

70 Soil-transmitted helminths (STH) are a leading cause of human disease, infecting over 1.5 billion  
71 individuals worldwide, with the majority of infections occurring in low and middle-income countries [1,2].  
72 Large-scale programs designed to control these infections have relied heavily on mass drug administration

Short title: High-throughput detection of STH infection

73 (MDA)-based deworming efforts, targeting populations at high risk of morbidity, namely preschool and  
74 school-aged children (PSAC and SAC) and women of reproductive age. Historically, these programs have  
75 utilized coproscopy-based techniques (such as the Kato-Katz method) to determine the prevalence and  
76 intensity of infection within a population, in turn informing decisions related to intervention frequency  
77 and duration [3]. This intervention and monitoring strategy has been shown to effectively reduce  
78 morbidity in multiple geographies [4]. However, such microscopy-based diagnostics are known to lack  
79 sensitivity. This shortcoming is particularly pronounced when infection intensities are low, as the  
80 sensitivity of detection may drop below 50% [3]. Additionally, with programmatic consideration being  
81 given to the possible transition from morbidity control strategies to strategies aimed at transmission  
82 interruption and/or the elimination of disease as a public health problem, diagnostics with high-  
83 throughput and improved performance characteristics are urgently needed. Although molecular assays  
84 such as quantitative polymerase chain reaction (qPCR) have been designed, tested, and used in research  
85 settings [3,4], the development and validation of a large-scale, high-throughput testing platform,  
86 exportable for use in multiple laboratories across both high- and low-infection intensity settings, has not  
87 been previously described.

88         The DeWorm3 project is a multi-country, community, cluster-randomized trial designed to  
89 determine the feasibility of successful transmission interruption of soil-transmitted helminth (STH)  
90 infections following sequential, high-coverage, community-wide mass-drug administration (cMDA)  
91 interventions [5]. This large-scale project includes study sites in Benin, India, and Malawi. As the primary  
92 discriminator of infection for this study, we developed and validated a large-scale, high-throughput, multi-  
93 site molecular testing platform for the detection of STH in human stool. In all three participating countries,  
94 a geographically defined administrative unit that included a population of approximately 80,000 – 140,000  
95 individuals was censused and mapped. Each study site was divided into 40 clusters, which were  
96 randomized (1:1) to receive either the intervention (biannual cMDA with albendazole) or control

Short title: High-throughput detection of STH infection

97 treatment (standard of care MDA delivered to PSAC & SAC annually) for three years [5]. In total,  
98 approximately 300,000 stool samples were collected during the five-year study period.

99         To meet the testing needs of the DeWorm3 project, and to provide a diagnostic design strategy  
100 for future studies and for potential future programmatic use, we developed a high-throughput, molecular  
101 testing platform for the detection of *Ascaris lumbricoides*, *Necator americanus*, *Ancylostoma duodenale*,  
102 and *Trichuris trichiura*. To ensure the integrity of our approach, an a priori validation plan was developed  
103 in consultation with an external panel of independent evaluators. The high-throughput testing approach  
104 was standardized and validated at laboratories in the United States (Quantigen, Fishers, IN), India  
105 (Christian Medical College, Vellore), and Benin (Institut de Recherche Clinique du Bénin, Abomey-Calavi)  
106 through the incorporation of rigorous pre-validation steps (run controls) and quality control (QC)  
107 measures. Here we describe the validation and quality assurance process of a high-throughput qPCR  
108 testing platform for the detection of these STH targets. This detailed description of our validation  
109 methods demonstrates the robust approach used to test the DeWorm3 trial samples and provides a  
110 framework for the deployment of this or other similar large-scale, community-level testing platforms in  
111 the future.

112

### 113 **Methods:**

114         All experiments in the validation of this high-throughput molecular system utilized the standard  
115 set of extraction and qPCR methods described below. The full report of the validation plan is available in  
116 the supplementary materials (S1 appendix).

117

### 118 **Sample disruption and nucleic acid isolation**

119 Isolation of DNA from STH eggs requires both physical disruption and chemical digestion. DNA extraction  
120 from *T. trichiura* eggs is particularly challenging due to their multi-layer structure: an outer vitelline layer,

Short title: High-throughput detection of STH infection

121 a middle chitinous layer that resists physical disruption, and an inner lipid layer that provides resistance  
122 to chemical breakdown [6]. In an attempt to overcome these challenges, we optimized a previously  
123 described bead-beating protocol to disrupt eggs within stool samples using a 96-well plate shaking system  
124 (OMNI International, Kennesaw, GA) [7,8]. After disruption, we isolated DNA using the semi-automated  
125 KingFisher Flex 96-well sample extractor (Thermo Fisher Scientific, Waltham, MA) with the MagMAX  
126 Microbiome Ultra Nucleic Acid Isolation Kit following the manufacturer's suggested protocol (Thermo  
127 Fisher Scientific) (Fig 1) with a single modification. Namely, MVP II Binding Beads (Thermo Fisher  
128 Scientific) were used in place of those included with the MagMAX kit.  
129

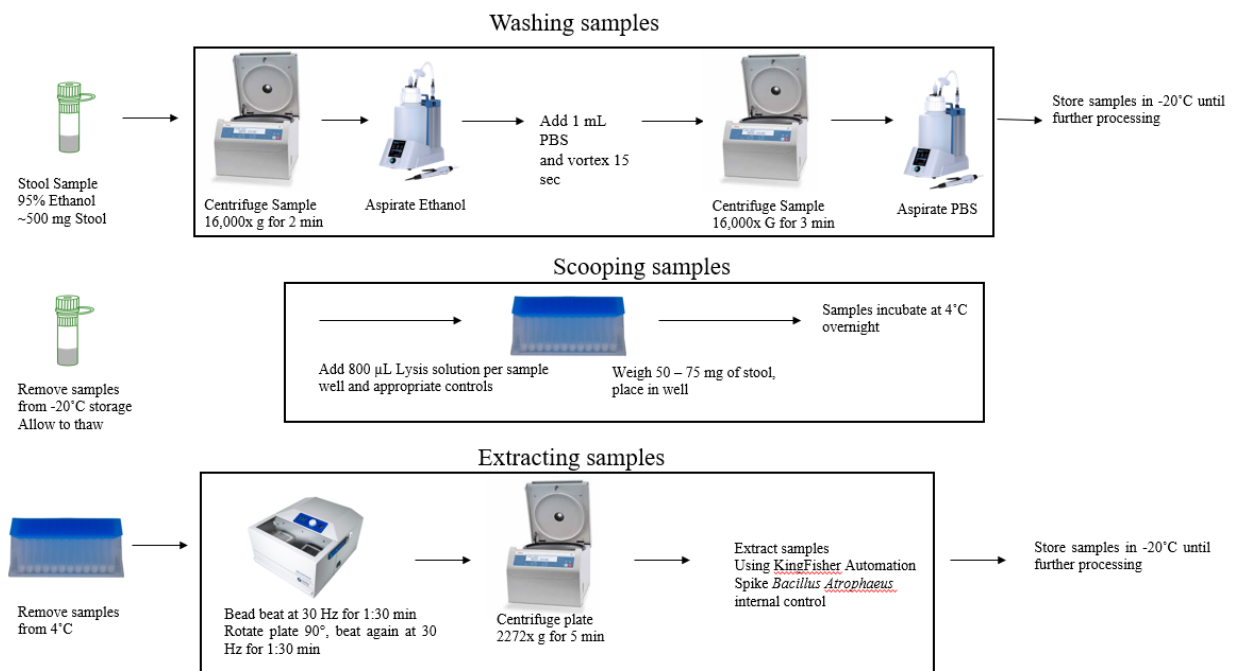

130  
131 **Fig 1. Procedure for isolation of DNA from stool samples.** After sample collection, isolation of DNA  
132 occurred in three steps. Samples were first washed, to remove the ethanol used for storage and  
133 preservation. Samples were then scooped into OMNI 96-well 1.4 mm ceramic bead-beating plates.  
134 Following overnight incubation, DNA extraction was performed.

135

136 **Multiplexing of qPCR assays**

137 Four previously developed primer/probe-based assays, each targeting a highly repetitive genomic  
138 element unique to a single STH species, were utilized in the development of our index assays [8,9]. Based  
139 on initial oligo optimization experiments, we selected primer and probe concentrations that yielded  
140 comparable  $C_T$  and  $\Delta R_n$  values between singleplex and multiplex formats when used on contrived mixed-  
141 infection controls (Table 1). Hydrolysis probes for each assay were labeled with either 6-FAM or Yakima  
142 Yellow reporters (IDT, Coralville, IA) and double-quenched with ZEN-IABkFQ chemistries (IDT). These  
143 fluorophore-quencher pairings were chosen due to the reduced background fluorescence and improved  
144 sensitivity which they offer relative to single-quenched probes [8]. Assays were then duplexed by pairing  
145 the *N. americanus* assay with the *T. trichiura* assay, and the *A. lumbricoides* assay with the *A. duodenale*  
146 assay. These pairings were chosen as *N. americanus* and *A. lumbricoides* were expected to represent the  
147 most common sources of infection across study sites. For this reason, it was decided that they should be  
148 separate, such that the likelihood of competition for reagents within a single qPCR reaction well would be  
149 reduced. Duplexed assays were then tested against a characterized panel of DNA samples previously  
150 extracted from stool collected in India. Results were compared to singleplex results obtained for the same  
151 samples (S1 Table). Through the process of duplexing, a single sample could be tested for the presence  
152 of all four STH targets in only two qPCR wells. To each of the two STH-specific duplexed assays, we added  
153 a third, primer-limited (50 nM each) ABY-labeled primer/probe-based assay designed to amplify an  
154 exogenous extraction/qPCR internal positive control (IPC): *Bacillus atrophaeus* bacteria (ZeptoMetrix,  
155 Buffalo, NY) [10]. The selection of this control is discussed in detail below. Details for all primers and  
156 probes used in the index assays are listed in Table 1.

157

158 **Table 1: Primers and probes used in index assays.**

Short title: High-throughput detection of STH infection

| Species                      | Primer/Probe<br>(Conc)                                                          | Sequence (5' – 3')                                           | Reference |
|------------------------------|---------------------------------------------------------------------------------|--------------------------------------------------------------|-----------|
| <i>Ascaris lumbricoides</i>  | Fwd (65 nM)                                                                     | 5' - CTTGTACCACGATAAAGGGCAT - 3'                             | [9]       |
|                              | Rev (65 nM)                                                                     | 5' - TCCCTTCCAATTGATCATCGAATAA - 3'                          |           |
|                              | Probe (250 nM)                                                                  | 5' - /5YakYel/TCTGTGCAT/ZEN/TATTGCTGCAATTGGGA /3IABkFQ/ - 3' |           |
| <i>Trichuris trichiura</i>   | Fwd (65 nM)                                                                     | 5' - GCGGTAGAGGAGCGATTT - 3'                                 | [8]       |
|                              | Rev (250 nM)                                                                    | 5' - TACTACCCATCACACATTAGCC - 3'                             |           |
|                              | Probe (250 nM)                                                                  | 5' - /5YakYel/TTTGC GGC/ZEN/GAGAACG GAAATATT /3IABkFQ/ - 3'  |           |
| <i>Ancylostoma duodenale</i> | Fwd (250 nM)                                                                    | 5' - GTATTTCACTCATATGATCGAGTGTTTC - 3'                       | [8]       |
|                              | Rev (250 nM)                                                                    | 5' - GTTTGAATTTGAGGTATTTGACCA - 3'                           |           |
|                              | Probe (250 nM)                                                                  | 5' - /56-FAM/TGACAGTGT/ZEN/GTCATACTGTGGAAA /3IABkFQ/ - 3'    |           |
| <i>Necator americanus</i>    | Fwd (250 nM)                                                                    | 5' - CCAGAATCGCCACAAATTGTAT - 3'                             | [8]       |
|                              | Rev (250 nM)                                                                    | 5' - GGGTTTGAGGCTTATCATAAAGAA - 3'                           |           |
|                              | Probe (250 nM)                                                                  | 5' - /56-FAM/CCCGATTG/ZEN/AGCTGAATTGTCAAA /3IABkFQ/ - 3'     |           |
| <i>Bacillus atrophaeus</i>   | Custom Assay (Thermo Fisher Scientific)<br>(Catalog # APGZFA7 – Ba06596576_s15) |                                                              | [10]      |

159

160

161 **Selection of qPCR reagents and lyophilization**

162 Sample-derived qPCR inhibitors can limit amplification of target STH gDNA [11]. To evaluate  
 163 master mix performance and select an appropriate chemistry, naive stool samples, collected in Benin,  
 164 were spiked with STH gDNA to generate qPCR sensitivity and amplification curves. Various commercially  
 165 available master mixes were tested on the QuantStudio 7 Real-Time PCR System (Life Technologies,



Short title: High-throughput detection of STH infection

166 Carlsbad, CA) at Quantigen. All tested mixes were obtained from Thermo Fisher Scientific and included  
167 TaqMan Environmental Master Mix 2.0, Ambion Path-ID qPCR Master Mix, and TaqPath 1-Step RT-qPCR  
168 Master Mix, CG. As our goal was to lyophilize all qPCR reagents – master mix and assays – to ensure  
169 reagent stability during international shipment and subsequent storage, and to improve workflow  
170 efficiency and accuracy in the laboratory through the reduction of pipetting steps, Thermo Fisher  
171 customized a comparable formulation of the TaqPath 1-Step RT-qPCR Master Mix, CG as a TaqMan 5X  
172 Lyo-ready qPCR Master Mix with ROX and excipient. Testing identified no significant differences in  
173 detection sensitivity as a function of master mix tested across target species (S2 Table). Argonaut  
174 Manufacturing Services (Carlsbad, CA) produced 384-well custom-designed lyophilized qPCR plates (lyo-  
175 plates) in bulk. Following batch testing at Quantigen, these plates were disseminated to all testing  
176 laboratories for use with all DeWorm3 sample testing. Subsequently, a second batch of plates was  
177 required, which was produced and tested in an identical manner.

178

## 179 **Assay validation**

180 **Control selection and validation.** Assay validation first requires control validation. Accordingly,  
181 appropriate controls were identified and selected for use with our high-throughput testing platform.  
182 Following selection, control validation focused on the performance of positive extraction controls (using  
183 both external and internal targets), and of appropriate qPCR controls.

184 An optimal external extraction control should reflect the performance characteristics and specific  
185 challenges of the real-world samples and targets being studied. *Ascaris suum* was selected as our  
186 platform's external extraction control, as it closely mirrors one of the target organisms (*Ascaris*  
187 *lumbricoides*) and is commercially available (Excelsior Sentinel, Inc., Ithica, NY). *Ascaris lumbricoides* and  
188 *Ascaris suum* are genetically similar organisms, thought to potentially represent sub-species rather than  
189 unique species [12]. Furthermore, the previously described assay target used in our index assay has been

Short title: High-throughput detection of STH infection

190 shown to amplify both species equivalently [13,14]. For these reasons, batches of *A. suum* control aliquots  
191 were prepared by adding approximately 35,000 eggs to 6 g of commercially purchased STH-negative stool  
192 (BioIVT, Westbury, NY). These batches were combined with 21 mL of molecular grade ethanol and were  
193 thoroughly mixed using a handheld immersion homogenizer (OMNI International, Kennesaw, GA).  
194 Homogenization yielded an egg concentration of approximately 1.7 eggs/ $\mu$ L. From this initial batch, 25 *A.*  
195 *suum* controls were randomly selected, extracted (as described previously [10]), and tested in duplicate  
196 using qPCR to determine the expected  $C_T$  range (S3 Table). Based on these results, passing qualifications  
197 for validation of the *A. suum* control were defined as positive *A. suum* amplification with a  $C_T$  value of  $\leq$   
198 23, a value approximating the upper bound of those seen during this initial testing.

199         Arguably, the most critical control is the internal positive control (IPC). When properly selected,  
200 this control serves as a per-sample extraction, recovery, and amplification control. For use with our  
201 testing platform, commercially available *Bacillus atrophaeus* was selected as the IPC. *B. atrophaeus* is a  
202 spore forming bacteria whose structure provides some resistance to lysis [15], making it an appropriate  
203 choice for use with STH eggs whose lysis requires mechanical disruption and chemical digestion. This  
204 bacterium is well-validated as a control for DNA extraction [10]. Given these characteristics, *B. atrophaeus*  
205 was commercially purchased (ZeptoMetrix, Buffalo, NY) for use with our platform [15]. Bacterial spores  
206 were spiked into 200 naive stool samples, and the *B. atrophaeus* IPC was validated using both index Assay  
207 1 (*B. atrophaeus*, *N. americanus*, *T. trichiura*) and index Assay 2 (*B. atrophaeus*, *A. lumbricoides*, *A.*  
208 *duodenale*). Passing qualifications for validation of this control were defined as positive *B. atrophaeus*  
209 amplification with a  $C_T$  score  $\leq$  34 in both Assay 1 & Assay 2 in the absence of STH amplification.

210         Plasmid DNA was used as a positive PCR control to ensure reagent integrity and to act as a qPCR  
211 process control. Stocks of four plasmids, each containing a single copy of the target sequence for one of  
212 the four pathogens of interest, were prepared as previously described [9]. Plasmids were then combined  
213 into a single pool and diluted for testing at two masses (2 pg and 200 fg). Twenty-five replicates of each

Short title: High-throughput detection of STH infection

214 dilution were then tested using the index assays to verify that all plasmid targets performed consistently  
215 and allowed for predictable and reproducible amplification within an expected  $C_T$  value range (S4 Table).  
216 Passing qualifications for validation of this control were defined as  $< 2$  standard deviations from the  
217 validation-defined mean  $C_T$  for each assay run with 100 fg of template. Thus, the  $C_T$  score cut-off for each  
218 species were determined as follows: *N. americanus*  $\leq 25.2$ , *A. lumbricoides*  $\leq 23.4$ , *A. duodenale*  $\leq 23.5$ ,  
219 and *T. trichiura*  $\leq 21.95$ .

220 **Preparation of spiked-stool standards.** A panel of controls comprised of twenty STH-positive and  
221 five STH-negative standards was prepared at Smith College (Northampton, MA). Standards were created  
222 by spiking helminth-naive stool with field samples of known STH infection status for each species of STH.  
223 To create each standard, 500 mg aliquots of STH-containing stool, previously characterized in an unrelated  
224 study [3], were inoculated into separate 6-gram aliquots of commercially available, STH-negative bulk  
225 stool (BioIVT). Each spiked stool sample was then suspended in 21 mL of molecular grade ethanol and  
226 thoroughly mixed using a hand-held homogenizer to increase the uniformity of egg distribution. For each  
227 standard, a total of 75 aliquots averaging 85 mg of stool homogenate in 300  $\mu$ L of ethanol were generated.  
228 Randomly selected aliquots of each standard were then tested at Smith College using singleplex qPCR  
229 assays to ensure the expected presence/absence of each target in each tested aliquot.

230 **Characterization of spiked-stool standards.** Three blinded aliquots of each standard ( $\sim 85$  mg per  
231 aliquot) were extracted and qPCR tested in quadruplicate at Quantigen using the multiplexed index assays  
232 (25 standards x 3 aliquots x 4 technical replicates). An individual test result was considered positive if  
233 amplification occurred with a  $C_T$  value  $< 40$ , while a test was considered negative if amplification did not  
234 occur. Following testing, results generated at Quantigen were compared with singleplex assay results  
235 generated at Smith College. This comparison was performed to ensure that all standards were of  
236 sufficient quality to allow for consistent performance. With two exceptions (samples 15 and 18), samples  
237 producing discordant results either (1) across technical replicates tested by the index assays at Quantigen

Short title: High-throughput detection of STH infection

238 and/or (2) between aliquots tested by the multiplexed index assays and the original singleplex assays  
239 (hereafter the reference assays) were eliminated. Samples 15 and 18 were retained despite inconsistent  
240 detection of *A. lumbricoides* and *N. americanus* due to their consistent performance when tested with the  
241 *T. trichiura* assay and the desire to retain *T. trichiura* containing standards. Elimination of poorly  
242 performing samples resulted in a panel of 18 standards that were used in all further testing/validation  
243 (Table 2).

244

245 **Table 2. Infection characteristics for spiked stool standards.**

| Standard # | STH Status          |                        |                      |                     |
|------------|---------------------|------------------------|----------------------|---------------------|
|            | <i>T. trichiura</i> | <i>A. lumbricoides</i> | <i>N. americanus</i> | <i>A. duodenale</i> |
| 1          |                     | X                      | X                    |                     |
| 2          |                     |                        | X                    |                     |
| 3          |                     | X                      |                      |                     |
| 4          |                     |                        | X                    |                     |
| 5          |                     | X                      |                      |                     |
| 6          |                     | X                      | X                    |                     |
| 7          |                     |                        | X                    |                     |
| 8          | X                   | X                      | X                    |                     |
| 9          |                     |                        |                      |                     |
| 10         |                     |                        |                      |                     |
| 11         |                     |                        |                      |                     |
| 12         |                     |                        |                      |                     |
| 13         |                     |                        |                      |                     |

Short title: High-throughput detection of STH infection

|    |   |     |     |   |
|----|---|-----|-----|---|
| 14 |   | X   | X   | X |
| 15 | X | (X) | X   |   |
| 16 | X | X   | X   |   |
| 17 | X | X   | X   |   |
| 18 | X | X   | (X) |   |

246 (X) indicate the presence of trace amounts of target that were inconsistently identified. For these  
247 samples, either a “positive” or a “negative” result was accepted as target concentrations fall at/near the  
248 limit of detection of the assay and therefore do not allow for consistently reproducible results.

249

250 **Evaluation of assay accuracy.** Assay accuracy was evaluated on the technical replicate level and  
251 the aliquot level using the above-described panel of contrived standards. Accuracy was calculated using  
252 the sum of true positives and true negatives as the numerator, and the total number of samples tested as  
253 the denominator (Equation 1). Three blinded aliquots (~85 mg) of each of the 18 contrived standards  
254 were extracted and qPCR-tested in quadruplicate using the index assays (18 standards x 3 aliquots x 4  
255 technical replicates). The true positive or negative status of each standard was defined by the initial  
256 characterization performed at Smith College using the singleplex reference assays (see “Preparation of  
257 spiked-stool standards” above). Evaluation of STH positivity at the aliquot level was defined as at least  
258 one positive amplification out of all technical replicates tested by the index assay. Well failures were not  
259 included in calculations of assay accuracy.

260

261 **Equation 1. Accuracy calculations of index assay performance when testing spiked-stool standards.**

262 (1)  $Accuracy = \frac{True\ Positives + True\ Negatives}{True\ Positives + True\ Negatives + Fales\ Positives + False\ Negatives}$

263

264           **Evaluation of assay specificity.** Assay specificity was assessed using 413 stool samples from Benin  
265 (213) and India (200) which initially tested negative for all species using the index assay. These samples  
266 were subsequently retested utilizing the reference assays, and specificity was calculated through  
267 comparison of these results.

268           **Evaluation of assay limits of detection.** A subset comprised of four spiked-stool standards was  
269 used to determine the limits of detection (LOD) for the index assays. LOD testing was possible, as matched  
270 microscopy data (Kato-Katz) were available for the field samples used in contrived sample creation. Using  
271 this information, the concentration of eggs per gram (EPG) of stool in the selected spiked stool standards  
272 could be estimated (Table 3). Extracted DNA for each standard was serially diluted 1:10 for a total of six  
273 dilution points. Each dilution point was tested by the index assays in 10 technical replicates (4 standards  
274 x 6 dilution points x 10 replicates), and the lowest concentration in which all 10 replicates generated a  
275 positive signal was identified. Starting at a concentration 2-fold higher than this concentration, five 1:2  
276 serial dilutions were created, and 20 technical replicates of each dilution point were tested by qPCR (4  
277 standards x 5 dilution points x 20 replicates). The LOD was determined as the lowest concentration at  
278 which at least 19/20 technical replicates amplified for the target STH species using Equation 2 below (S5  
279 Table).

280

281 **Table 3. Characteristics of contrived standards used for limit of detection testing.**

| Target | Concentration of positive field sample (EPG) | Mass of field sample (mg) | Mass of naïve stool (mg) | Total mass of contrived sample (g) | Concentration of contrived sample (EPG) |
|--------|----------------------------------------------|---------------------------|--------------------------|------------------------------------|-----------------------------------------|
|--------|----------------------------------------------|---------------------------|--------------------------|------------------------------------|-----------------------------------------|

|                        |      |     |      |       |        |
|------------------------|------|-----|------|-------|--------|
| <i>N. americanus</i>   | 960  | 500 | 6052 | 6.552 | 73.26  |
| <i>A. lumbricoides</i> | 2100 | 500 | 6052 | 6.552 | 160.26 |
| <i>A. duodenale</i>    | 500* | 500 | 6357 | 6.357 | 78.65  |
| <i>T. trichiura</i>    | 4224 | 500 | 6045 | 6.545 | 322.69 |

282 \* *A. duodenale*-containing field samples were not available. Therefore, whole-genome amplified *A.*  
 283 *duodenale* DNA was spiked at a concentration mimicking the DNA content of eggs at a 500 egg  
 284 concentration.

285

286 **Equation 2. Calculation of index assay limit of detection as determined by the testing of DNA extracts**  
 287 **isolated from contrived stool standards.**

$$288 \frac{STH\ eggs}{1\ g\ of\ Standard} \times 50\ mg\ aliquot \times qPCR\ dilution\ limit = LOD$$

289

290 **Assessment of sample heterogeneity.** Sample heterogeneity was explored by selecting a random  
 291 10% of the first 2,000 tested baseline samples from Benin and extracting four aliquots of each sample. To  
 292 test for site-dependent extraction differences, for each sample, two extractions were completed using  
 293 the index assay protocol and two independent extractions were completed via the reference assay  
 294 protocol. Each extraction was then tested using both index and reference assays. Testing generated a  
 295 total of two data points per extraction (eight data points for each sample). (Fig 2).

296

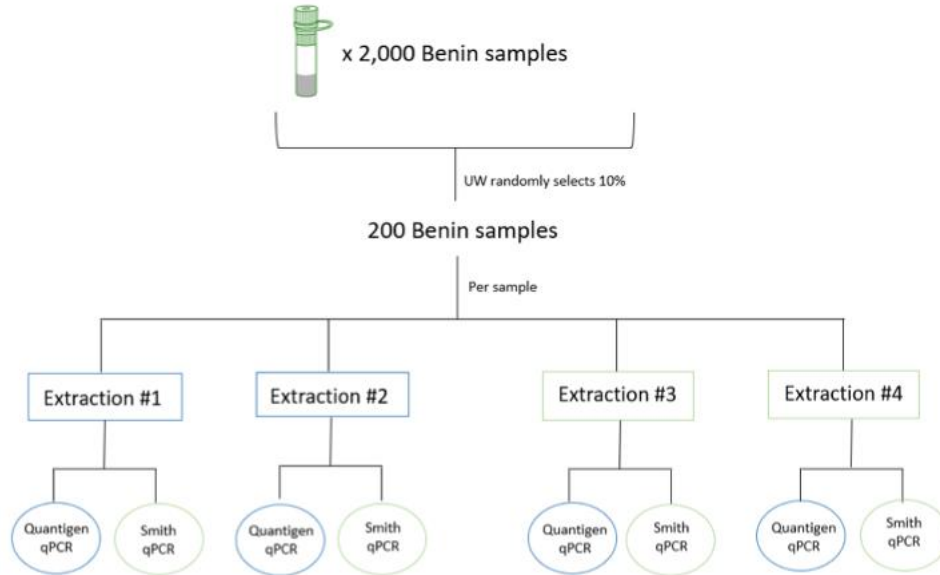

297

298 **Fig 2. Assessment of sample heterogeneity.** Illustration depicting how each sample used in the  
299 assessment of sample heterogeneity generated eight points of data. Blue outlines indicate the index  
300 protocol and green outlines indicate the reference protocol.

301

### 302 **Data description**

303 All supporting data is included in the body of the manuscript or as part of the supplemental  
304 material.

305

### 306 **Results:**

#### 307 **Control selection and validation**

308 All run controls (internal and external extraction controls as well as qPCR controls) passed the  
309 predefined thresholds for validation. Passing qualifications to validate the performance of the *A. suum*  
310 external extraction control were defined as positive *A. suum* amplification with a  $C_T$  value of  $\leq 23$ . The  
311 coefficient of variation (CV) for the *A. suum* positive extraction control was 4% ( $n = 50$ ) with an average  $C_T$   
312 of 21.14 ( $\pm 0.85$ ) (Fig 2a). Validation testing for the performance of the *B. atrophaeus* IPC resulted in a CV



313 of 7% with an average  $C_T$  value of 29.96 ( $\pm 2.02$ ) for Assay 1 and an average  $C_T$  value of 30.00 ( $\pm 2.00$ ) for  
314 Assay 2 (Fig 2b), meeting the minimum requirements for validation. All qPCR positive controls also passed  
315 the predefined validation threshold, with  $C_T$  values falling below required values for all target species in  
316 all replicate reactions.

317

318

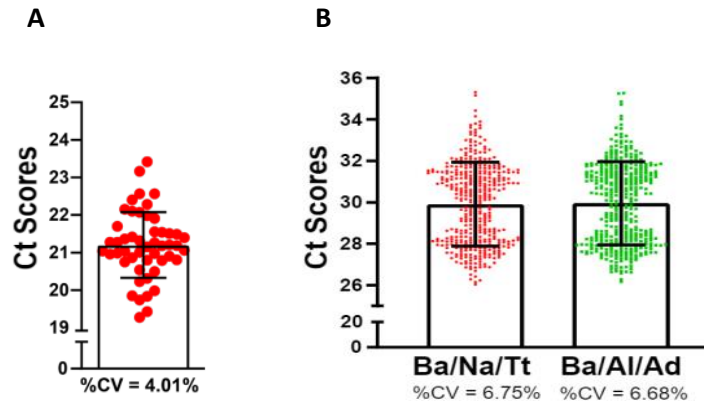

319

320 **Fig 3. Results of control validation. (A)** Dot plot depicting the range of  $C_T$  values for *A. suum* detection.  
321 The error bars represent the standard deviation. **(B)** Dot plot depicting  $C_T$  values for all *B. atroparhaeus*  
322 results obtained when running both index assays on a panel of STH-negative, *B. atroparhaeus*-positive  
323 samples. Error bars represent the standard deviation.

324

### 325 Evaluation of assay accuracy

326 Extraction and testing of three independent aliquots of all contrived spiked-stool standards  
327 resulted in positive detection for each expected species in at least three out of the four qPCR replicates.  
328 In total, <1% of all qPCR wells failed to amplify as expected (Table 4). Assay accuracy at the technical  
329 replicate level met the minimum target with >99% accuracy for all assays. The *A. lumbricoides*, *N.*  
330 *americanus*, and *A. duodenale* assays met the minimum standard of 100% accuracy at the individual  
331 extraction level. However, one *T. trichiura* false positive result was seen among the 12 technical replicates  
332 tested, producing an individual extraction level accuracy for *T. trichiura* of 98.1% (Table 4, S6 Table).

333

334 **Table 4. Index assay accuracy at the individual extraction and technical replicate levels.**

|                              | <b>Assay Accuracy</b> |                        |                      |                     |
|------------------------------|-----------------------|------------------------|----------------------|---------------------|
| <b>Level</b>                 | <i>T. trichiura</i>   | <i>A. lumbricoides</i> | <i>N. americanus</i> | <i>A. duodenale</i> |
| <b>Technical Replicate</b>   | 99.5%                 | 100.0%                 | 100.0%               | 100.0%              |
| <b>Individual Extraction</b> | 98.1%                 | 100.0%                 | 100.0%               | 100.0%              |

335

336 Upon quadruplicate repeat testing at Quantigen, using both the index multiplex and reference  
 337 singleplex assays (n = 8), the one false positive *T. trichiura* amplification event could not be reproduced.  
 338 None of the STH-negative stool standards (n = 5) produced a positive result for any erroneous/unexpected  
 339 target.

340

341 **Evaluation of assay specificity**

342 Assay specificity was evaluated through testing, using the singleplex reference assays, of 413  
 343 samples that initially tested negative for all STH species at Quantigen. Reference assay testing of 213  
 344 samples from Benin produced three positive results (two *N. americanus* positive results and one *A.*  
 345 *lumbricoides* positive result). To evaluate these discordant results, DNA extracts from all three discordant  
 346 samples were retested using both liquid and lyophilized assays. On repeat testing, all three samples were  
 347 confirmed to be positive in liquid and/or lyophilized testing formats. To further investigate aliquot-to-  
 348 aliquot variability, three new aliquots of each discordant sample (three samples x three aliquots) were re-  
 349 extracted using the index platform extraction procedure and tested by the index liquid assay in single  
 350 qPCR replicates. All previously detected species were detected in at least two out of three aliquots.

351 Reference assay testing of 200 samples from India produced five *N. americanus* positive samples  
352 previously identified as negative during Quantigen’s initial screening efforts using the index assays. The  
353 DNA extracts for all five discordant samples were retested, in triplicate, using both the lyophilized index  
354 assay and the reference liquid assay. Results were again negative using the index procedures, but positive  
355 by reference methods. To investigate aliquot-to-aliquot variability, additional aliquots of the five  
356 discordant samples were then re-extracted. Three of the five samples were re-extracted in duplicate, and  
357 two samples underwent re-extraction of a single aliquot due to limitations in sample volume. All eight re-  
358 extraction products ([three samples x two extractions] + [two samples x one extraction]) were tested via  
359 the lyophilized index assay in duplicate, and all samples confirmed the detection of *N. americanus* in at  
360 least one retested extract. Based on these data, we calculated the index assay specificity at 98%.

361

### 362 Evaluation of assay limits of detection

363 Through the testing of a dilution series of characterized samples, the lowest concentration at  
364 which at least 19/20 technical replicates amplified for each target STH species was identified. These  
365 concentrations were then used to calculate LODs, and the LOD for each assay was determined to be <1  
366 EPG (Table 5).

367

368 **Table 5. By species results of limit of detection testing.**

| Species                | Eggs Per Gram           |
|------------------------|-------------------------|
| <i>N. americanus</i>   | 1.83 x 10 <sup>-3</sup> |
| <i>A. lumbricoides</i> | 0.02                    |
| <i>A. duodenale</i>    | 0.98                    |
| <i>T. trichiura</i>    | 0.04                    |

369

### 370 **Assessment of sample heterogeneity**

371 To determine the potential impact of aliquot heterogeneity on the detection of target species  
372 from a single sample, 200 randomly selected samples (10%), from among the first 2,000 samples tested  
373 in Benin, were subjected to further testing. Four aliquots were taken from each of these 200 samples and  
374 DNA was independently extracted from each aliquot with two extractions occurring using reference  
375 procedures and two extractions occurring using index procedures. Follow up qPCR analysis then occurred  
376 on each extraction product using both the index and reference assays. Minimal discordance was observed  
377 in three of the four target species; 8/200 *N. americanus* results discordant, 3/200 *T. trichiura* results  
378 discordant, and 10/200 *A. lumbricoides* results discordant. All testing for *A. duodenale* was concordant  
379 negative. The rate of discordance was similar across laboratories, assay methodologies, and extraction  
380 techniques (S7 Table). Extracts one, three, and four each detected STH species in 36/200 samples while  
381 extract two detected STH species in 43/200 samples. To further assess the performance of the reference  
382 assay and the index assay, concordance of STH detection was calculated across all extracts and assays.  
383 Overall concordance for each species was as follows: *N. americanus* – 98.5% concordant, *T. trichiura* –  
384 100% concordant, *A. duodenale* – 100% concordant, and *A. lumbricoides* – 98.1% concordant.

385

### 386 **Discussion**

387 As the global burden of disease due to STH infections declines, largely because of both  
388 improvements in sanitation infrastructure and increasing coverage of mass drug administration programs,  
389 accurate estimates of helminth prevalence are critical to inform policy and programs. Multiple studies  
390 have demonstrated that molecular assays are superior for the detection of infection and the  
391 quantification of prevalence and intensity across geographic settings and epidemiologic contexts [16]. As  
392 the prevalence and intensity of STH infections declines globally, programs shift towards the elimination  
393 of STH as a public health problem, or to the interruption of disease transmission; the improved sensitivity

Short title: High-throughput detection of STH infection

394 and accuracy of molecular assays become critical for programs to achieve and confirm success.  
395 Unfortunately, platforms for the use of molecular diagnostics for STH at scale have not been previously  
396 developed or commercialized and these assays have largely been confined to research use. The small-  
397 scale use of these assays has meant that there has been little efficiency of scale, allowing costs to remain  
398 high and methods, operating procedures, and QA/QC methodologies to remain unstandardized.

399         Here we describe a well-validated, standardized, and scalable high-throughput platform for qPCR-  
400 based detection of STH at the population level. Importantly, validation practices for an assay designed  
401 for the diagnostic testing of an individual patient are fundamentally different from an assay designed  
402 strictly for the assessment of population-level infection prevalence and/or intensity for purposes of  
403 informing programmatic decision making. It is therefore critical that an assay be evaluated in the context  
404 of its expected utility. Accordingly, appropriate criteria for diagnostic platform validation were defined a  
405 priori, and the assay was validated in multiple laboratories. The results of this validation study  
406 demonstrate reliable, reproducible, and accurate detection of STH targets with high sensitivity and  
407 specificity.

408         The poor diagnostic performance of existing, commonly employed, coproscopic techniques limits  
409 the ability to define a true gold standard for detection of STH. Given that properly designed molecular  
410 assays are significantly more sensitive and specific than microscopy-based methods, both reference and  
411 index assays employed in this validation study would be expected to detect more true infections than  
412 would microscopy-based approaches. As a result, validation requires testing against a contrived panel,  
413 created by the spiking of an appropriate, naive matrix material with various combinations/concentrations  
414 of target material (eggs, DNA, etc.). Through the creation and testing of 18 such samples, each containing  
415 combinations of none/some/all the targets of interest at various concentrations, we were able to validate  
416 the performance of our index assays relative to the corresponding reference assays, and to assess  
417 transferability of technology through assay use at multiple laboratories. In addition, owing to their well-

Short title: High-throughput detection of STH infection

418 characterized nature, these samples were also used to create a bank of material appropriate for  
419 troubleshooting, technician qualification, and periodic proficiency testing. Coupled with additional  
420 controls including a *B. atrophaeus* IPC, an *A. suum*-containing external extraction control, and appropriate  
421 PCR controls, we were able to overcome the challenges associated with a lack of properly characterized  
422 control material in the absence of a true gold standard.

423         The approach to assay development, validation, and verification described here has several  
424 strengths. Our index platform is intended for use with samples collected as part of a rigorous, large-scale  
425 clinical trial (the DeWorm3 cluster randomized trial) conducted across multiple geographic and  
426 epidemiologic settings and involving hundreds of thousands of individuals. Given this intended use case,  
427 the a priori establishment of a validation protocol and the inclusion of a group of external evaluators  
428 increases the rigor of the assessment, which is critical for inspiring confidence in study results. In addition,  
429 the demonstration of reproducibility across laboratories suggests that this assay can be successfully  
430 transferred while maintaining diagnostic performance. This is critical in results interpretation for multi-  
431 site studies at scale and for future potential programmatic use. Finally, the creation of standard operating  
432 procedures, training documents, data collection instruments, and QA/QC procedures and panels can be  
433 used to support the establishment of large-scale laboratory platforms capable of supporting STH programs  
434 globally. These procedures and materials complement currently available resources, such as the STH  
435 community's external quality assessment scheme, which is a valuable tool for validating and assessing the  
436 periodic performance of laboratories but does not support the frequency of quality assurance testing  
437 required by an effort such as the DeWorm3 trial [17].

438         While the development and validation pipelines that we employed allowed us to create a testing  
439 platform that is well-suited to its intended task, some limitations remain. Most critically, assessment of  
440 sample heterogeneity revealed some discrepancies in detection of targets across aliquots created from  
441 individual samples. These discrepancies were likely the result of the heterogenous distribution of target

Short title: High-throughput detection of STH infection

442 material within each sample, despite efforts to optimize homogenization procedures prior to DNA  
443 extraction. The inability to generate completely homogeneous samples means that the potential for some  
444 number of false negative results remains. Additional work will determine the frequency of false  
445 negativity, the likelihood of obtaining a false-negative result as a function of target mass/copy number in  
446 a sample, and the ability to buffer against false-negative results through procedural modifications  
447 (replicate testing, etc.). An additional limitation involved an element of inefficiency in DNA recovery  
448 because of imperfect methods for DNA extraction from fecal samples.

449 In addition to its intended purpose as a validation procedure for a high-throughput molecular  
450 testing platform for large-scale population-level studies of STH prevalence, the methodologies described  
451 here have utility beyond their primary use case. Through the adaptation of the described procedures, we  
452 have provided a blueprint for platform development capable of aiding programmatic efforts to evaluate  
453 other pathogens of interest. As global programs aimed at control/elimination of numerous neglected  
454 tropical diseases (NTD)s continue to realize varying degrees of success, there is increased need for  
455 sensitive and specific tools capable of accurately assessing infection prevalence at scale [18]. As NTD  
456 programs pivot towards elimination of disease as a public health problem and, in some cases, to  
457 elimination of transmission, such tools are needed to inform intervention stopping decisions and to  
458 monitor for disease recrudescence in the post-intervention setting. As such, guidelines facilitating the  
459 development of platforms capable of providing these answers, in the absence of reliable gold-standard  
460 methods, will be critical.

461 The success of current STH programs has led to substantial reductions in infection prevalence in  
462 target populations, primarily among children, and to a lesser extent, among women of reproductive age.  
463 Novel diagnostics are needed to accurately monitor the progress of STH programs given the limitations of  
464 existing tools. The platform described here is a well validated quantitative PCR-based approach that could

Short title: High-throughput detection of STH infection

465 be readily scaled for broad programmatic use in support of global morbidity management and STH  
466 transmission interruption efforts.

467

## 468 **Acknowledgements**

469 The authors wish to thank all the study participants, communities and community leaders, national NTD  
470 program staff and other local, regional and national partners who have participated or supported the  
471 DeWorm3 study. We would like to acknowledge the work of all members of the DeWorm3 study teams  
472 and affiliated institutions, in particular the laboratory staff at Christian Medical College, Vellore, Versiti  
473 Inc, and the Institut de recherche Clinique du Benin (IRCB). We also wish to acknowledge the contributions  
474 of the DeWorm3 Data Safety Monitoring Board, including Richard Hayes, Harriet Mpairwe,  
475 Purushothaman Jambulingam and Jimmy Whitworth.

476 This work was supported by a Bill and Melinda Gates Foundation investment to the University of  
477 Washington (OPP1129535, PI JLW). A prior award to the Natural History Museum, London, also from the  
478 Bill and Melinda Gates Foundation (INV-030049), funded a portion of the work described. There is no  
479 involvement of the funders in final decisions regarding the study design and trial procedures or decision  
480 to publish the manuscript or in data collection, analysis or publication of study results. The funders  
481 reviewed the final decisions regarding study design and trial procedures.

482

## 483 **References:**

- 484 1. Pullan RL, Brooker SJ. The global limits and population at risk of soil-transmitted helminth  
485 infections in 2010. *Parasites & Vectors*. 2012;5: 81. doi:10.1186/1756-3305-5-81
- 486 2. Montresor A, Mupfasoni D, Mikhailov A, Mwinzi P, Lucianez A, Jamsheed M, et al. The global  
487 progress of soil-transmitted helminthiases control in 2020 and World Health Organization targets



- 488 for 2030. PLOS Neglected Tropical Diseases. 2020;14: e0008505.  
489 doi:10.1371/journal.pntd.0008505
- 490 3. Benjamin-Chung J, Pilotte N, Ercumen A, Grant JR, Maasch JRMA, Gonzales AM, et al. Comparison  
491 of multi-parallel qPCR and Kato-Katz for detection of soil-transmitted helminth infection among  
492 children in rural Bangladesh. In: scite.ai [Internet]. 2019 [cited 22 Aug 2023]. doi:10.1101/629501
- 493 4. Medley GF, Turner HC, Baggaley RF, Holland C, Hollingsworth TD. Chapter Six - The Role of More  
494 Sensitive Helminth Diagnostics in Mass Drug Administration Campaigns: Elimination and Health  
495 Impacts. In: Basáñez MG, Anderson RM, editors. *Advances in Parasitology*. Academic Press; 2016.  
496 pp. 343–392. doi:10.1016/bs.apar.2016.08.005
- 497 5. Ásbjörnsdóttir KH, Ajjampur SSR, Anderson RM, Bailey R, Gardiner I, Halliday KE, et al. Assessing  
498 the feasibility of interrupting the transmission of soil-transmitted helminths through mass drug  
499 administration: The DeWorm3 cluster randomized trial protocol. *PLOS Neglected Tropical*  
500 *Diseases*. 2018;12: e0006166. doi:10.1371/journal.pntd.0006166
- 501 6. Wharton DA, Jenkins T. Structure and chemistry of the egg-shell of a nematode (*Trichuris suis*).  
502 *Tissue Cell*. 1978;10: 427–440. doi:10.1016/s0040-8166(16)30338-x
- 503 7. Mejia R, Vicuña Y, Broncano N, Sandoval C, Vaca M, Chico M, et al. A novel, multi-parallel, real-  
504 time polymerase chain reaction approach for eight gastrointestinal parasites provides improved  
505 diagnostic capabilities to resource-limited at-risk populations. *Am J Trop Med Hyg*. 2013;88:  
506 1041–1047. doi:10.4269/ajtmh.12-0726
- 507 8. Pilotte N, Papaiakovou M, Grant JR, Bierwert LA, Llewellyn S, McCarthy JS, et al. Improved PCR-  
508 Based Detection of Soil Transmitted Helminth Infections Using a Next-Generation Sequencing  
509 Approach to Assay Design. Albonico M, editor. *PLoS Negl Trop Dis*. 2016;10: e0004578.  
510 doi:10.1371/journal.pntd.0004578

- 511 9. Pilotte N, Maasch JRMA, Easton AV, Dahlstrom E, Nutman TB, Williams SA. Targeting a highly  
512 repeated germline DNA sequence for improved real-time PCR-based detection of *Ascaris* infection  
513 in human stool. *PLOS Neglected Tropical Diseases*. 2019;13: e0007593.  
514 doi:10.1371/journal.pntd.0007593
- 515 10. Picard FJ, Gagnon M, Bernier MR, Parham NJ, Bastien M, Boissinot M, et al. Internal Control for  
516 Nucleic Acid Testing Based on the Use of Purified *Bacillus atrophaeus* subsp. *globigii* Spores.  
517 *Journal of Clinical Microbiology*. 2009;47: 751–757. doi:10.1128/JCM.01746-08
- 518 11. Acharya KR, Dhand NK, Whittington RJ, Plain KM. PCR Inhibition of a Quantitative PCR for  
519 Detection of *Mycobacterium avium* Subspecies *Paratuberculosis* DNA in Feces: Diagnostic  
520 Implications and Potential Solutions. *Front Microbiol*. 2017;08. doi:10.3389/fmicb.2017.00115
- 521 12. Betson M, Stothard JR. *Ascaris lumbricoides* or *Ascaris suum*: What's in a Name? *J Infect Dis*.  
522 2016;213: 1355–1356. doi:10.1093/infdis/jiw037
- 523 13. Leles D, Gardner SL, Reinhard K, Iñiguez A, Araujo A. Are *Ascaris lumbricoides* and *Ascaris suum* a  
524 single species? *Parasit Vectors*. 2012;5: 42. doi:10.1186/1756-3305-5-42
- 525 14. Betson M, Halstead FD, Nejsun P, Imison E, Khamis IS, Sousa-Figueiredo JC, et al. A molecular  
526 epidemiological investigation of *Ascaris* on Unguja, Zanzibar using isoenzyme analysis, DNA  
527 barcoding and microsatellite DNA profiling. *Transactions of the Royal Society of Tropical Medicine*  
528 *and Hygiene*. 2011;105: 370–379. doi:10.1016/j.trstmh.2011.04.009
- 529 15. Sella SRBR, Vandenberghe LPS, Soccol CR. *Bacillus atrophaeus*: main characteristics and  
530 biotechnological applications – a review. *Critical Reviews in Biotechnology*. 2015;35: 533–545.  
531 doi:10.3109/07388551.2014.922915
- 532 16. Werkman M, Wright JE, Truscott JE, Easton AV, Oliveira RG, Toor J, et al. Testing for soil-  
533 transmitted helminth transmission elimination: Analysing the impact of the sensitivity of different

- 534 diagnostic tools. PLOS Neglected Tropical Diseases. 2018;12: e0006114.  
535 doi:10.1371/journal.pntd.0006114
- 536 17. Cools P, van Lieshout L, Koelewijn R, Addiss D, Ajjampur SSR, Ayana M, et al. First international  
537 external quality assurance scheme of nucleic acid amplification tests for the detection of  
538 Schistosoma and soil-transmitted helminths, including Strongyloides: A pilot study. PLOS  
539 Neglected Tropical Diseases. 2020;14:e0008231. doi:10.1371/journal.pntd.0008231
- 540 18. Souza AA, Ducker C, Argaw D, King JD, Solomon AW, Biamonte MA, et al. Diagnostics and the  
541 neglected tropical diseases roadmap: setting the agenda for 2030. Transactions of The Royal  
542 Society of Tropical Medicine and Hygiene. 2021;115: 129–135. doi:10.1093/trstmh/traa118  
543
